# Supplementary material for: Interspecies Transmission of Reassortant Swine Influenza A Virus Containing Genes from Swine Influenza A(H1N1)pdm09 and A(H1N2) Viruses
Source: PubMed Central journal article supplement (PMC6986826; doi:10.3201/eid2602.190486), 2020-02
Supplement: 19-0486-Techapp-s1.pdf [file 19-0486-Techapp-s1.pdf]

# Interspecies Transmission of Reassortant Swine Influenza A Virus Containing Genes from Swine Influenza A(H1N1)pdm09 and A(H1N2) Viruses

## Appendix

### Organ Culture Preparation

Ferret tracheal cultures were prepared as follows. Petri dishes were prepared with plugs of 1% (wt/vol) low-gelling temperature agarose (Sigma, <https://www.sigmaaldrich.com>) in water. Plugs were immersed in Dulbecco modified Eagle medium (DMEM) medium containing 2 mol/L L-glutamine and antimicrobial drugs (200 U/mL penicillin, 2,000 µg/mL streptomycin, and 2.5 µg/mL amphotericin B (all from GIBCO, <https://www.thermofisher.com>), then incubated at 37°C in an atmosphere of 5% CO<sub>2</sub>. Tracheal tissue was immersed in prewarmed, supplemented DMEM and incubated at 37°C in an atmosphere of 5% CO<sub>2</sub> for 20 min. The medium was replaced ≥3 times, and the tissue was dissected and placed onto sterile filter paper overlaying an agarose plug, with the filter paper forming a wick into the medium.

To culture lung tissue, a lung lobe was filled through the bronchi with phosphate-buffered saline supplemented with antimicrobial drugs and maintained at 37°C. Low-gelling temperature agarose (1% and 4% [wt/vol] in phosphate-buffered saline) was equilibrated to 38°C. The lung lobe was filled with 1% agarose and set with 4% agarose inside a syringe. Once solidified, the top of the syringe was removed, the lung extruded, and 3–4-mm sections were cut and incubated 18 h in supplemented DMEM at 37°C in an atmosphere of 5% CO<sub>2</sub>. Sections were moved to a 6-well plate, and the outer 4% agarose layer was removed.

### Positive Strand-Specific PCR

Positive-sense RNA encoding the virus matrix protein gene was quantified to assess levels of virus replication. Reverse transcription was conducted by using the M-MLV Reverse Transcription Kit (Promega, <https://www.promega.com>) and reverse primer NcRev1 (5'-AGTAGAAACAAGGTAGTTTT-3') at a final concentration of 2.5 µmol/L. Real-time PCR was

conducted by using the Quantifast Kit (QIAGEN, <https://www.qiagen.com>) according to the manufacturer's specifications using the forward and reverse primers M808F (5'-GCAGATGCAGCGATTCAAG-3') and swM1003R (5'-CACTCTGCTGTTTCCTGTTGATAT-3') at final concentrations of 0.04  $\mu\text{mol/L}$  and the probe M945RPro (FAM-5'-AGGCCCTCTTTTCAAACCGTATT-3'-TAMRA at a final concentration of 0.02  $\mu\text{mol/L}$ . Cycling parameters for an MxPro3000 Instrument (Agilent, <https://www.agilent.com>) were 1 cycle of 95°C for 3 min and 40 cycles at 94°C for 10 s, 55°C for 30 s, and 72°C for 30 s. Data readings were collected during annealing and analyzed by using MxPro software (Agilent).

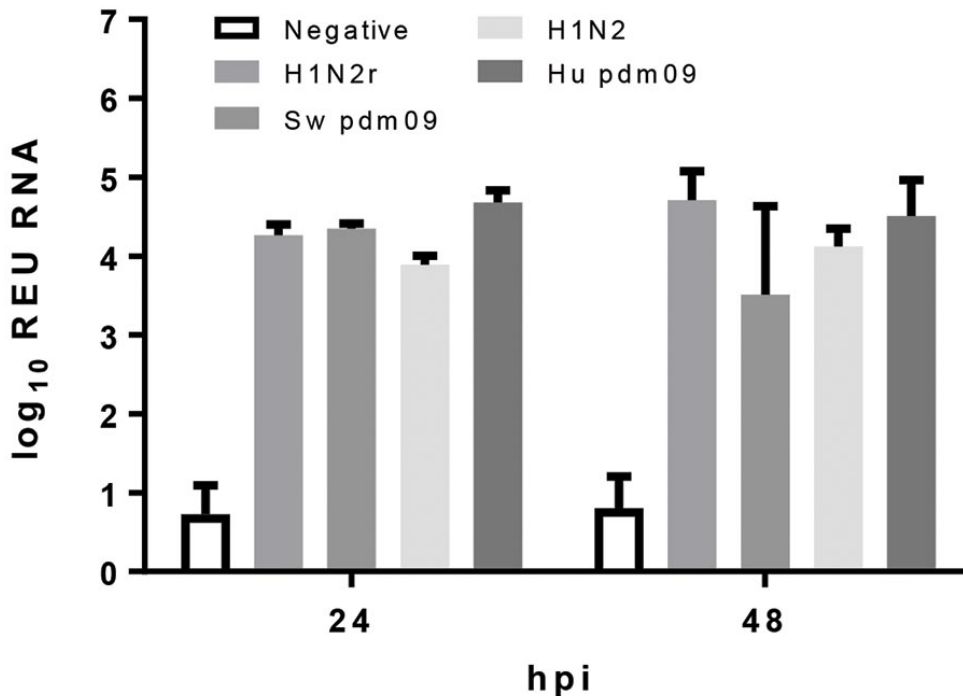

**Appendix Figure.** Infection and replication of swine H1N2r virus in ferret lung organ cultures. Quantity of influenza A virus RNA in ferret lung ex vivo organ cultures at 24 h and 48 h postinoculation with swine viruses H1N2r (A/swine/England/1382/2010), Sw pdm09 (A/swine/England/1353/2009), H1N2 (A/swine/England/997/2009), and human isolate Hu pdm09 (A/England/195/2009). Results are  $\log_{10}$  REU in combined supernatants and tissue lysates for each sample. Error bars indicate SEM for triplicate cultures. hpi, hours postinoculation; Hu, human; H1N2r, reassortant swine influenza A virus; pdm, pandemic; REU, relative equivalent unit; Sw, swine.
